# Supplementary material
Source: MDPI journal article supplement (https://www.mdpi.com/1999-4907/13/2/215)
Supplement: s1 [file s1]

Supplementary Tables

**Table S1.** Geographic location of the 80 populations of six *Pinus* spp. and results of diversity and divergence indexes calculated using GenAlEx 6.501 (criterion 1).

| Code                                                   | State/Municipality            | Latitude  | Longitude   | Elev.<br>(m) | DGEO   | N  | PopGD  | GD     | $v_2$ | % Poly | DW    |
|--------------------------------------------------------|-------------------------------|-----------|-------------|--------------|--------|----|--------|--------|-------|--------|-------|
| <b>Peripheral populations of <i>P. arizonica</i></b>   |                               |           |             |              |        |    |        |        |       |        |       |
| PA-CB                                                  | Chih./Temósachi               | 28°42'40" | -108°15'49" | 2499         | 0.057  | 35 | 69.266 | 64.097 | 1.303 | 0.698  | 0.095 |
| PA-PG                                                  | Chih./Temósachi               | 28°43'51" | -108°17'59" | 2629         | 0.837  | 35 | 66.999 | 57.375 | 1.278 | 0.627  | 0.082 |
| PA-M6                                                  | Chih./Madera                  | 29°22'2"  | -108°11'31" | 2587         | 2.589  | 35 | 71.806 | 69.318 | 1.328 | 0.726  | 0.104 |
| PA-BC                                                  | Chih./Temósachi               | 28°37'24" | -108°15'54" | 2670         | 2.619  | 35 | 69.986 | 63.452 | 1.306 | 0.641  | 0.080 |
| PA-PUL                                                 | Dgo./San Dimas                | 24°27'09" | -105°54'16" | 2533         | 3.733  | 35 | 68.878 | 55.143 | 1.266 | 0.586  | 0.070 |
| PA-TOR                                                 | Dgo./San Dimas                | 24°27'00" | -105°56'26" | 2486         | 4.257  | 35 | 68.784 | 61.472 | 1.291 | 0.671  | 0.089 |
| PA-MRM                                                 | Chih./Madera                  | 29°13'13" | -108°13'11" | 2398         | 4.557  | 35 | 68.306 | 58.750 | 1.286 | 0.600  | 0.067 |
| PA-UA                                                  | Chih./Balleza                 | 26°21'38" | -106°20'04" | 2675         | 5.421  | 35 | 77.397 | 75.156 | 1.352 | 0.780  | 0.138 |
| PA-GALL                                                | Chih./Guachochi               | 26°44'41" | -107°10'06" | 2480         | 5.463  | 34 | 76.382 | 71.321 | 1.338 | 0.726  | 0.128 |
| PA-MU                                                  | Chih./Gpe. y Calvo            | 26°01'39" | -106°02'38" | 2669         | 6.034  | 35 | 76.498 | 77.273 | 1.363 | 0.791  | 0.132 |
| PA-TRI                                                 | Dgo./San Dimas                | 24°19'38" | -105°48'58" | 2651         | 6.299  | 35 | 70.858 | 64.249 | 1.297 | 0.756  | 0.107 |
| PA-EM                                                  | Chih./Balleza                 | 26°20'07" | -106°19'34" | 2700         | 6.595  | 35 | 76.736 | 71.882 | 1.336 | 0.778  | 0.139 |
| PA-BI                                                  | Chih./Balleza                 | 26°33'44" | -106°25'25" | 2684         | 7.108  | 35 | 77.144 | 76.592 | 1.363 | 0.734  | 0.121 |
| PA-MJ                                                  | Chih./Guachochi               | 26°48'24" | -107°02'19" | 2420         | 9.602  | 35 | 70.176 | 65.190 | 1.310 | 0.695  | 0.088 |
| PA-ENG                                                 | Chih./Gpe. y Calvo            | 26°04'16" | -106°54'26" | 2657         | 11.148 | 35 | 86.765 | 86.360 | 1.411 | 0.799  | 0.127 |
| PA-TE                                                  | Chih./Balleza                 | 26°36'55" | -106°32'33" | 2760         | 12.522 | 35 | 72.849 | 69.798 | 1.329 | 0.704  | 0.101 |
| <b>Central populations of <i>P. arizonica</i></b>      |                               |           |             |              |        |    |        |        |       |        |       |
| PA-M                                                   | Chih./Balleza                 | 26°15'10" | -106°24'10" | 2801         | 16.109 | 35 | 69.326 | 63.576 | 1.305 | 0.663  | 0.078 |
| PA-EN                                                  | Chih./Balleza                 | 26°21'29" | -106°24'58" | 2721         | 16.663 | 35 | 75.626 | 70.914 | 1.332 | 0.772  | 0.134 |
| PA-GI                                                  | Dgo./Tepehuanes               | 25°05'57" | -105°51'12" | 2569         | 17.087 | 35 | 70.375 | 65.718 | 1.314 | 0.682  | 0.094 |
| PA-RI                                                  | Chih./Gpe. y Calvo            | 26°02'30" | -106°46'03" | 2571         | 18.695 | 35 | 69.056 | 63.052 | 1.300 | 0.693  | 0.086 |
| PA-TO                                                  | Dgo./Guanaceví                | 26°10'58" | -106°20'28" | 3062         | 18.760 | 35 | 66.677 | 52.027 | 1.250 | 0.578  | 0.064 |
| PA-TG                                                  | Dgo./Guanaceví                | 26°10'50" | -106°21'08" | 2913         | 18.813 | 35 | 70.177 | 65.674 | 1.314 | 0.682  | 0.093 |
| PA-GUA                                                 | Dgo./Guanaceví                | 26°10'37" | -106°20'52" | 2956         | 19.810 | 35 | 66.483 | 56.376 | 1.267 | 0.627  | 0.077 |
| PA-CA-G                                                | Dgo./Guanaceví                | 26°10'11" | -106°20'54" | 2948         | 20.379 | 35 | 80.840 | 83.755 | 1.387 | 0.813  | 0.157 |
| PA-MO                                                  | Chih./Gpe. y Calvo            | 26°10'23" | -106°38'07" | 2724         | 20.431 | 38 | 71.878 | 69.780 | 1.327 | 0.716  | 0.093 |
| <b>Peripheral populations of <i>P. cembroides</i></b>  |                               |           |             |              |        |    |        |        |       |        |       |
| PCE-MA                                                 | Chih./Balleza                 | 26°32'18" | -106°28'32" | 2588         | 1.19   | 35 | 88.082 | 71.812 | 1.339 | 0.799  | 0.317 |
| PCE-AD                                                 | Dgo./Santiago<br>Papasquiario | 24°58'22" | -105°32'41" | 2331         | 1.80   | 35 | 91.778 | 79.842 | 1.376 | 0.816  | 0.372 |
| PCE-MM                                                 | Dgo./Guanaceví                | 26°15'09" | -106°4'12"  | 2631         | 7.71   | 35 | 90.576 | 79.267 | 1.373 | 0.802  | 0.318 |
| <b>Central populations of <i>P. cembroides</i></b>     |                               |           |             |              |        |    |        |        |       |        |       |
| PCE-CT                                                 | Dgo./Guanaceví                | 26°19'20" | -106°05'03" | 2499         | 13.24  | 35 | 90.961 | 79.039 | 1.372 | 0.832  | 0.359 |
| PCE-PEN                                                | Chih./Balleza                 | 26°57'01" | -106°38'43" | 2369         | 14.95  | 34 | 93.638 | 82.993 | 1.380 | 0.866  | 0.426 |
| <b>Peripheral populations of <i>P. durangensis</i></b> |                               |           |             |              |        |    |        |        |       |        |       |
| PD-PIS                                                 | Dgo./San Dimas                | 24°27'20" | -106°08'08" | 2495         | 1.70   | 35 | 74.939 | 68.461 | 1.320 | 0.753  | 0.123 |
| PD-MC                                                  | Chih./Urique                  | 27°13'00" | -107°59'53" | 2381         | 2.35   | 35 | 77.992 | 76.961 | 1.362 | 0.778  | 0.124 |
| PD-JO                                                  | Dgo./Santiago<br>Papasquiario | 25°00'11" | -106°09'47" | 2410         | 2.77   | 35 | 73.383 | 68.679 | 1.320 | 0.723  | 0.098 |
| PD-SO                                                  | Dgo./Santiago<br>Papasquiario | 25°00'08" | -106°10'26" | 2405         | 2.79   | 35 | 73.538 | 69.341 | 1.328 | 0.712  | 0.102 |
| PD-O-M                                                 | Chih./Madera                  | 29°01'11" | -108°19'54" | 2441         | 2.81   | 35 | 74.108 | 65.469 | 1.314 | 0.654  | 0.094 |
| PD-D                                                   | Chih./Madera                  | 29°29'49" | -108°18'58" | 2217         | 3.25   | 35 | 74.504 | 69.361 | 1.328 | 0.731  | 0.121 |
| PD-CQ                                                  | Chih./Urique                  | 27°12'18" | -108°00'28" | 2444         | 4.15   | 34 | 81.453 | 78.067 | 1.367 | 0.816  | 0.161 |
| PD-CE                                                  | Chih./Balleza                 | 26°15'10" | -106°24'10" | 2801         | 4.43   | 35 | 72.220 | 65.671 | 1.310 | 0.720  | 0.108 |

|                                                        |                               |           |             |      |        |    |        |        |       |       |       |
|--------------------------------------------------------|-------------------------------|-----------|-------------|------|--------|----|--------|--------|-------|-------|-------|
| PD-MCCI                                                | Dgo./Ocampo                   | 28°10'32" | -108°16'0"  | 2212 | 5.75   | 35 | 85.924 | 89.388 | 1.414 | 0.873 | 0.152 |
| PD-PT                                                  | Dgo./San Dimas                | 24°23'09" | -106°02'57" | 2438 | 5.84   | 35 | 74.530 | 65.180 | 1.307 | 0.701 | 0.123 |
| PD-PORR                                                | Chih./Guachochi               | 26°44'27" | -107°15'12" | 2552 | 6.64   | 35 | 79.634 | 71.284 | 1.330 | 0.728 | 0.126 |
| PD-ME                                                  | Dgo./Otáez                    | 24°44'11" | -105°56'43" | 2647 | 6.70   | 35 | 72.651 | 67.358 | 1.317 | 0.717 | 0.106 |
| PD-AN                                                  | Chih./Balleza                 | 26°25'18" | -106°31'36" | 2768 | 7.43   | 35 | 77.608 | 71.398 | 1.334 | 0.778 | 0.144 |
| PD-CU                                                  | Dgo./San Dimas                | 24°26'09" | -106°03'05" | 2450 | 8.61   | 35 | 70.197 | 59.748 | 1.279 | 0.679 | 0.092 |
| PD-MH                                                  | Chih./Urique                  | 27°25'03" | -107°57'01" | 1848 | 9.48   | 35 | 75.663 | 71.459 | 1.334 | 0.761 | 0.110 |
| PD-PIE                                                 | Chih./Madera                  | 29°41'00" | -108°26'36" | 2219 | 9.74   | 35 | 73.578 | 66.655 | 1.310 | 0.704 | 0.088 |
| <b>Central populations of <i>P. durangensis</i></b>    |                               |           |             |      |        |    |        |        |       |       |       |
| PD-MP                                                  | Dgo./Ocampo                   | 28°13'34" | -108°17'51" | 2385 | 10.26  | 35 | 72.443 | 68.037 | 1.320 | 0.701 | 0.106 |
| PD-PI                                                  | Chih./Gpe. y Calvo            | 26°4'41"  | -106°59'21" | 2630 | 11.41  | 33 | 81.279 | 53.201 | 1.257 | 0.570 | 0.051 |
| PD-45                                                  | Chih./Temósachi               | 28°44'19" | -108°16'18" | 2635 | 11.41  | 35 | 74.718 | 69.476 | 1.325 | 0.756 | 0.114 |
| PD-POR                                                 | Chih./Guachochi               | 26°46'42" | -107°15'9"  | 2578 | 11.84  | 35 | 78.150 | 78.848 | 1.367 | 0.797 | 0.111 |
| PD-GRA                                                 | Chih./Guachochi               | 26°41'21" | -107°15'20" | 2543 | 11.97  | 35 | 72.103 | 64.007 | 1.303 | 0.687 | 0.085 |
| PD-AG                                                  | Chih./Gpe. y Calvo            | 25°47'16" | -106°41'14" | 2595 | 12.34  | 35 | 76.045 | 72.457 | 1.342 | 0.761 | 0.127 |
| PD-MG                                                  | Chih./Madera                  | 29°35'56" | -108°26'12" | 2231 | 15.36  | 35 | 74.964 | 72.850 | 1.343 | 0.723 | 0.118 |
| PD-PA                                                  | Chih./Gpe. y Calvo            | 26°1'13"  | -106°54'32" | 2381 | 18.60  | 35 | 79.063 | 71.788 | 1.339 | 0.726 | 0.090 |
| PD-PB                                                  | Chih./Gpe. y Calvo            | 26°5'14"  | -106°47'37" | 2701 | 29.53  | 35 | 79.165 | 75.224 | 1.350 | 0.810 | 0.153 |
| PD-PAN                                                 | Chih./Guachochi               | 27°15'37" | -107°27'16" | 2516 | 31.45  | 35 | 72.382 | 60.766 | 1.289 | 0.679 | 0.076 |
| <b>Peripheral populations of <i>P. engelmannii</i></b> |                               |           |             |      |        |    |        |        |       |       |       |
| PE-LJ                                                  | Chih./Balleza                 | 26°31'22" | -106°17'41" | 2602 | 0.618  | 35 | 71.670 | 66.901 | 1.316 | 0.704 | 0.099 |
| PE-CP                                                  | Chih./Gpe. y Calvo            | 26°10'24" | -106°36'21" | 2740 | 1.446  | 35 | 74.135 | 71.422 | 1.332 | 0.799 | 0.148 |
| PE-MM-S2                                               | Dgo./Santiago<br>Papasquiario | 24°58'15" | -105°32'33" | 2347 | 1.919  | 35 | 67.527 | 58.319 | 1.281 | 0.638 | 0.079 |
| PE-LCH                                                 | Chih./Madera                  | 29°12'51" | -108°9'17"  | 2180 | 2.493  | 35 | 66.749 | 59.281 | 1.285 | 0.630 | 0.078 |
| PE-PP                                                  | Chih./Moris                   | 28°14'07" | -108°45'40" | 1820 | 2.737  | 35 | 66.023 | 60.726 | 1.284 | 0.649 | 0.086 |
| PE-ON                                                  | Chih./Madera                  | 29°15'27" | -108°08'13" | 2176 | 3.696  | 35 | 67.209 | 64.091 | 1.299 | 0.684 | 0.098 |
| PE-CHC                                                 | Chih./Moris                   | 28°13'18" | -108°43'51" | 1876 | 4.704  | 35 | 66.059 | 61.462 | 1.290 | 0.654 | 0.092 |
| PE-MC3                                                 | Chih./Urique                  | 27°19'40" | -108°09'42" | 1838 | 4.985  | 35 | 70.134 | 67.583 | 1.313 | 0.761 | 0.131 |
| PE-MC-U                                                | Chih./Urique                  | 27°26'30" | -108°3'56"  | 2090 | 6.382  | 35 | 70.730 | 69.788 | 1.322 | 0.704 | 0.107 |
| <b>Central populations of <i>P. engelmannii</i></b>    |                               |           |             |      |        |    |        |        |       |       |       |
| PE-MCHI                                                | Chih./Guachochi               | 27°9'58"  | -107°00'07" | 2344 | 16.019 | 35 | 70.351 | 66.874 | 1.314 | 0.715 | 0.123 |
| PE-AM                                                  | Chih./Gpe. y Calvo            | 26°13'04" | -106°50'59" | 2390 | 17.259 | 35 | 66.718 | 60.924 | 1.289 | 0.632 | 0.080 |
| PE-CUE                                                 | Chih./Guachochi               | 27°13'24" | -107°3'28"  | 2309 | 18.22  | 35 | 72.102 | 67.751 | 1.315 | 0.753 | 0.146 |
| <b>Peripheral populations of <i>P. herrerae</i></b>    |                               |           |             |      |        |    |        |        |       |       |       |
| PH-GUH                                                 | Dgo./San Dimas                | 24°28'06" | -106°06'12" | 2358 | 3.98   | 35 | 69.517 | 61.855 | 1.302 | 0.649 | 0.135 |
| PH-PSU                                                 | Dgo./San Dimas                | 24°26'13" | -106°07'54" | 2663 | 5.38   | 35 | 72.639 | 70.716 | 1.333 | 0.780 | 0.210 |
| PH-MR                                                  | Chih./Ocampo                  | 28°10'22" | -108°15'01" | 2251 | 5.63   | 35 | 72.155 | 67.439 | 1.319 | 0.715 | 0.199 |
| PH-MC                                                  | Chih./Guazapares              | 27°27'02" | -108°04'44" | 2089 | 7.85   | 35 | 68.661 | 61.560 | 1.295 | 0.621 | 0.140 |
| PH-RM                                                  | Dgo./San Dimas                | 24°26'01" | -106°03'08" | 2434 | 7.89   | 35 | 73.586 | 69.600 | 1.329 | 0.742 | 0.223 |
| <b>Central populations of <i>P. herrerae</i></b>       |                               |           |             |      |        |    |        |        |       |       |       |
| PH-MC2                                                 | Chih./Urique                  | 27°19'29" | -108°09'37" | 1841 | 11.49  | 35 | 68.117 | 57.903 | 1.279 | 0.621 | 0.131 |
| PH-PI                                                  | Chih./Urique                  | 27°18'37" | -108°09'33" | 2399 | 12.61  | 35 | 77.212 | 72.128 | 1.338 | 0.778 | 0.277 |
| PH-MC1                                                 | Chih./Urique                  | 27°18'37" | -108°09'33" | 1858 | 13.17  | 35 | 72.761 | 59.839 | 1.285 | 0.663 | 0.142 |
| <b>Peripheral populations of <i>P. leiophylla</i></b>  |                               |           |             |      |        |    |        |        |       |       |       |
| PLE-CMP                                                | Chih./Urique                  | 27°16'12" | -108°00'53" | 2035 | 1.91   | 35 | 74.799 | 70.259 | 1.330 | 0.778 | 0.234 |
| PLE-FR                                                 | Chih./Guachochi               | 26°45'48" | -107°07'17" | 2502 | 6.27   | 35 | 76.210 | 74.897 | 1.354 | 0.778 | 0.244 |
| <b>Central populations of <i>P. leiophylla</i></b>     |                               |           |             |      |        |    |        |        |       |       |       |
| PLE-EV                                                 | Chih./Madera                  | 29°17'22" | -108°06'00" | 2201 | 9.80   | 35 | 70.973 | 65.402 | 1.306 | 0.731 | 0.243 |
| PLE-AG                                                 | Dgo./Santiago<br>Papasquiario | 29°17'22" | -108°06'00" | 2511 | 16.14  | 35 | 75.542 | 71.708 | 1.337 | 0.797 | 0.267 |

Note: Sample size (N), elevation (Elev.) PopGD = average genetic distance within populations; GD = average genetic distance between populations; DGEO = distance to the nearest edge (km); diversity and divergence indexes:  $v_2$  = measured genetic diversity through the effective number of variants, % Poly = Percentage of polymorphic fragments, DW = frequency down-weighted marker value.

**Table S2.** Geographic location of the 80 populations of six *Pinus* spp. and results of diversity and divergence indexes calculated using GenAlEx 6.501 (criterion 2).

| Code                                                  | State/Municipality        | Latitude  | Longitude   | Elev.<br>(m) | DGEO   | N  | PopGD  | GD     | $v_2$ | % Poly | DW    |
|-------------------------------------------------------|---------------------------|-----------|-------------|--------------|--------|----|--------|--------|-------|--------|-------|
| <b>Peripheral populations of <i>P. arizonica</i></b>  |                           |           |             |              |        |    |        |        |       |        |       |
| PA-CB                                                 | Chih./Temósachi           | 28°42'40" | -108°15'49" | 2499         | 0.057  | 35 | 69.266 | 64.097 | 1.303 | 0.698  | 0.095 |
| PA-PG                                                 | Chih./Temósachi           | 28°43'51" | -108°17'59" | 2629         | 0.837  | 35 | 66.999 | 57.375 | 1.278 | 0.627  | 0.082 |
| PA-M6                                                 | Chih./Madera              | 29°22'2"  | -108°11'31" | 2587         | 2.589  | 35 | 71.806 | 69.318 | 1.328 | 0.726  | 0.104 |
| PA-BC                                                 | Chih./Temósachi           | 28°37'24" | -108°15'54" | 2670         | 2.619  | 35 | 69.986 | 63.452 | 1.306 | 0.641  | 0.080 |
| PA-PUL                                                | Dgo./San Dimas            | 24°27'09" | -105°54'16" | 2533         | 3.733  | 35 | 68.878 | 55.143 | 1.266 | 0.586  | 0.070 |
| PA-TOR                                                | Dgo./San Dimas            | 24°27'00" | -105°56'26" | 2486         | 4.257  | 35 | 68.784 | 61.472 | 1.291 | 0.671  | 0.089 |
| PA-MRM                                                | Chih./Madera              | 29°13'13" | -108°13'11" | 2398         | 4.557  | 35 | 68.306 | 58.750 | 1.286 | 0.600  | 0.067 |
| PA-UA                                                 | Chih./Balleza             | 26°21'38" | -106°20'04" | 2675         | 5.421  | 35 | 77.397 | 75.156 | 1.352 | 0.780  | 0.138 |
| PA-GALL                                               | Chih./Guachochi           | 26°44'41" | -107°10'06" | 2480         | 5.463  | 34 | 76.382 | 71.321 | 1.338 | 0.726  | 0.128 |
| PA-MU                                                 | Chih./Gpe. y Calvo        | 26°01'39" | -106°02'38" | 2669         | 6.034  | 35 | 76.498 | 77.273 | 1.363 | 0.791  | 0.132 |
| PA-TRI                                                | Dgo./San Dimas            | 24°19'38" | -105°48'58" | 2651         | 6.299  | 35 | 70.858 | 64.249 | 1.297 | 0.756  | 0.107 |
| PA-EM                                                 | Chih./Balleza             | 26°20'07" | -106°19'34" | 2700         | 6.595  | 35 | 76.736 | 71.882 | 1.336 | 0.778  | 0.139 |
| PA-BI                                                 | Chih./Balleza             | 26°33'44" | -106°25'25" | 2684         | 7.108  | 35 | 77.144 | 76.592 | 1.363 | 0.734  | 0.121 |
| PA-MJ                                                 | Chih./Guachochi           | 26°48'24" | -107°02'19" | 2420         | 9.602  | 35 | 70.176 | 65.190 | 1.310 | 0.695  | 0.088 |
| PA-M                                                  | Chih./Balleza             | 26°15'10" | -106°24'10" | 2801         | 16.109 | 35 | 69.326 | 63.576 | 1.305 | 0.663  | 0.078 |
| PA-GI                                                 | Dgo./Tepehuanes           | 25°05'57" | -105°51'12" | 2569         | 17.087 | 35 | 70.375 | 65.718 | 1.314 | 0.682  | 0.094 |
| PA-TO                                                 | Dgo./Guanaceví            | 26°10'58" | -106°20'28" | 3062         | 18.760 | 35 | 66.677 | 52.027 | 1.250 | 0.578  | 0.064 |
| PA-TG                                                 | Dgo./Guanaceví            | 26°10'50" | -106°21'08" | 2913         | 18.813 | 35 | 70.177 | 65.674 | 1.314 | 0.682  | 0.093 |
| PA-GUA                                                | Dgo./Guanaceví            | 26°10'37" | -106°20'52" | 2956         | 19.810 | 35 | 66.483 | 56.376 | 1.267 | 0.627  | 0.077 |
| PA-CA-G                                               | Dgo./Guanaceví            | 26°10'11" | -106°20'54" | 2948         | 20.379 | 35 | 80.840 | 83.755 | 1.387 | 0.813  | 0.157 |
| PA-TE                                                 | Chih./Balleza             | 26°36'55" | -106°32'33" | 2760         | 12.522 | 35 | 72.849 | 69.798 | 1.329 | 0.704  | 0.101 |
| <b>Central populations of <i>P. arizonica</i></b>     |                           |           |             |              |        |    |        |        |       |        |       |
| PA-EN                                                 | Chih./Balleza             | 26°21'29" | -106°24'58" | 2721         | 16.663 | 35 | 75.626 | 70.914 | 1.332 | 0.772  | 0.134 |
| PA-ENG                                                | Chih./Gpe. y Calvo        | 26°04'16" | -106°54'26" | 2657         | 11.148 | 35 | 86.765 | 86.360 | 1.411 | 0.799  | 0.127 |
| PA-RI                                                 | Chih./Gpe. y Calvo        | 26°02'30" | -106°46'03" | 2571         | 18.695 | 35 | 69.056 | 63.052 | 1.300 | 0.693  | 0.086 |
| PA-MO                                                 | Chih./Gpe. y Calvo        | 26°10'23" | -106°38'07" | 2724         | 20.431 | 38 | 71.878 | 69.780 | 1.327 | 0.716  | 0.093 |
| PA-PG                                                 | Chih./Temósachi           | 28°43'51" | -108°17'59" | 2629         | 0.837  | 35 | 66.999 | 57.375 | 1.278 | 0.627  | 0.082 |
| PA-M6                                                 | Chih./Madera              | 29°22'2"  | -108°11'31" | 2587         | 2.589  | 35 | 71.806 | 69.318 | 1.328 | 0.726  | 0.104 |
| PA-BC                                                 | Chih./Temósachi           | 28°37'24" | -108°15'54" | 2670         | 2.619  | 35 | 69.986 | 63.452 | 1.306 | 0.641  | 0.080 |
| PA-UA                                                 | Chih./Balleza             | 26°21'38" | -106°20'04" | 2675         | 5.421  | 35 | 77.397 | 75.156 | 1.352 | 0.780  | 0.138 |
| PA-MU                                                 | Chih./Gpe. y Calvo        | 26°01'39" | -106°02'38" | 2669         | 6.034  | 35 | 76.498 | 77.273 | 1.363 | 0.791  | 0.132 |
| PA-TRI                                                | Dgo./San Dimas            | 24°19'38" | -105°48'58" | 2651         | 6.299  | 35 | 70.858 | 64.249 | 1.297 | 0.756  | 0.107 |
| PA-EM                                                 | Chih./Balleza             | 26°20'07" | -106°19'34" | 2700         | 6.595  | 35 | 76.736 | 71.882 | 1.336 | 0.778  | 0.139 |
| PA-BI                                                 | Chih./Balleza             | 26°33'44" | -106°25'25" | 2684         | 7.108  | 35 | 77.144 | 76.592 | 1.363 | 0.734  | 0.121 |
| <b>Peripheral populations of <i>P. cembroides</i></b> |                           |           |             |              |        |    |        |        |       |        |       |
| PCE-AD                                                | Dgo./Santiago Papasquiaro | 24°58'22" | -105°32'41" | 2331         | 1.80   | 35 | 91.778 | 79.842 | 1.376 | 0.816  | 0.372 |
| PCE-MM                                                | Dgo./Guanaceví            | 26°15'09" | -106°4'12"  | 2631         | 7.71   | 35 | 90.576 | 79.267 | 1.373 | 0.802  | 0.318 |
| PCE-PEN                                               | Chih./Balleza             | 26°57'01" | -106°38'43" | 2369         | 14.95  | 34 | 93.638 | 82.993 | 1.380 | 0.866  | 0.426 |
| <b>Central populations of <i>P. cembroides</i></b>    |                           |           |             |              |        |    |        |        |       |        |       |
| PCE-MA                                                | Chih./Balleza             | 26°32'18" | -106°28'32" | 2588         | 1.19   | 35 | 88.082 | 71.812 | 1.339 | 0.799  | 0.317 |
| PCE-CT                                                | Dgo./Guanaceví            | 26°19'20" | -106°05'03" | 2499         | 13.24  | 35 | 90.961 | 79.039 | 1.372 | 0.832  | 0.359 |

| Peripheral populations of <i>P. durangensis</i> |                            |           |             |      |        |    |        |        |       |       |       |
|-------------------------------------------------|----------------------------|-----------|-------------|------|--------|----|--------|--------|-------|-------|-------|
| PD-MC                                           | Chih./Urique               | 27°13'00" | -107°59'53" | 2381 | 2.35   | 35 | 77.992 | 76.961 | 1.362 | 0.778 | 0.124 |
| PD-D                                            | Chih./Madera               | 29°29'49" | -108°18'58" | 2217 | 3.25   | 35 | 74.504 | 69.361 | 1.328 | 0.731 | 0.121 |
| PD-CE                                           | Chih./Balleza              | 26°15'10" | -106°24'10" | 2801 | 4.43   | 35 | 72.220 | 65.671 | 1.310 | 0.720 | 0.108 |
| PD-MCCI                                         | Dgo./Ocampo                | 28°10'32" | -108°16'0"  | 2212 | 5.75   | 35 | 85.924 | 89.388 | 1.414 | 0.873 | 0.152 |
| PD-ME                                           | Dgo./Otáez                 | 24°44'11" | -105°56'43" | 2647 | 6.70   | 35 | 72.651 | 67.358 | 1.317 | 0.717 | 0.106 |
| PD-AN                                           | Chih./Balleza              | 26°25'18" | -106°31'36" | 2768 | 7.43   | 35 | 77.608 | 71.398 | 1.334 | 0.778 | 0.144 |
| PD-MH                                           | Chih./Urique               | 27°25'03" | -107°57'01" | 1848 | 9.48   | 35 | 75.663 | 71.459 | 1.334 | 0.761 | 0.110 |
| PD-PIE                                          | Chih./Madera               | 29°41'00" | -108°26'36" | 2219 | 9.74   | 35 | 73.578 | 66.655 | 1.310 | 0.704 | 0.088 |
| PD-PI                                           | Chih./Gpe. y Calvo         | 26°4'41"  | -106°59'21" | 2630 | 11.41  | 33 | 81.279 | 53.201 | 1.257 | 0.570 | 0.051 |
| PD-45                                           | Chih./Temósachi            | 28°44'19" | -108°16'18" | 2635 | 11.41  | 35 | 74.718 | 69.476 | 1.325 | 0.756 | 0.114 |
| PD-AG                                           | Chih./Gpe. y Calvo         | 25°47'16" | -106°41'14" | 2595 | 12.34  | 35 | 76.045 | 72.457 | 1.342 | 0.761 | 0.127 |
| PD-MG                                           | Chih./Madera               | 29°35'56" | -108°26'12" | 2231 | 15.36  | 35 | 74.964 | 72.850 | 1.343 | 0.723 | 0.118 |
| PD-PA                                           | Chih./Gpe. y Calvo         | 26°1'13"  | -106°54'32" | 2381 | 18.60  | 35 | 79.063 | 71.788 | 1.339 | 0.726 | 0.090 |
| PD-PB                                           | Chih./Gpe. y Calvo         | 26°5'14"  | -106°47'37" | 2701 | 29.53  | 35 | 79.165 | 75.224 | 1.350 | 0.810 | 0.153 |
| Central populations of <i>P. durangensis</i>    |                            |           |             |      |        |    |        |        |       |       |       |
| PD-PIS                                          | Dgo./San Dimas             | 24°27'20" | -106°08'08" | 2495 | 1.70   | 35 | 74.939 | 68.461 | 1.320 | 0.753 | 0.123 |
| PD-CQ                                           | Chih./Urique               | 27°12'18" | -108°00'28" | 2444 | 4.15   | 34 | 81.453 | 78.067 | 1.367 | 0.816 | 0.161 |
| PD-POR                                          | Chih./Guachochi            | 26°46'42" | -107°15'9"  | 2578 | 11.84  | 35 | 78.150 | 78.848 | 1.367 | 0.797 | 0.111 |
| PD-GRA                                          | Chih./Guachochi            | 26°41'21" | -107°15'20" | 2543 | 11.97  | 35 | 72.103 | 64.007 | 1.303 | 0.687 | 0.085 |
| PD-JO                                           | Dgo./Santiago Papasquiario | 25°00'11" | -106°09'47" | 2410 | 2.77   | 35 | 73.383 | 68.679 | 1.320 | 0.723 | 0.098 |
| PD-SO                                           | Dgo./Santiago Papasquiario | 25°00'08" | -106°10'26" | 2405 | 2.79   | 35 | 73.538 | 69.341 | 1.328 | 0.712 | 0.102 |
| PD-O-M                                          | Chih./Madera               | 29°01'11" | -108°19'54" | 2441 | 2.81   | 35 | 74.108 | 65.469 | 1.314 | 0.654 | 0.094 |
| PD-PT                                           | Dgo./San Dimas             | 24°23'09" | -106°02'57" | 2438 | 5.84   | 35 | 74.530 | 65.180 | 1.307 | 0.701 | 0.123 |
| PD-PORR                                         | Chih./Guachochi            | 26°44'27" | -107°15'12" | 2552 | 6.64   | 35 | 79.634 | 71.284 | 1.330 | 0.728 | 0.126 |
| PD-PAN                                          | Chih./Guachochi            | 27°15'37" | -107°27'16" | 2516 | 31.45  | 35 | 72.382 | 60.766 | 1.289 | 0.679 | 0.076 |
| PD-CU                                           | Dgo./San Dimas             | 24°26'09" | -106°03'05" | 2450 | 8.61   | 35 | 70.197 | 59.748 | 1.279 | 0.679 | 0.092 |
| PD-MP                                           | Dgo./Ocampo                | 28°13'34" | -108°17'51" | 2385 | 10.26  | 35 | 72.443 | 68.037 | 1.320 | 0.701 | 0.106 |
| Peripheral populations of <i>P. engelmannii</i> |                            |           |             |      |        |    |        |        |       |       |       |
| PE-LJ                                           | Chih./Balleza              | 26°31'22" | -106°17'41" | 2602 | 0.618  | 35 | 71.670 | 66.901 | 1.316 | 0.704 | 0.099 |
| PE-CP                                           | Chih./Gpe. y Calvo         | 26°10'24" | -106°36'21" | 2740 | 1.446  | 35 | 74.135 | 71.422 | 1.332 | 0.799 | 0.148 |
| PE-PP                                           | Chih./Moris                | 28°14'07" | -108°45'40" | 1820 | 2.737  | 35 | 66.023 | 60.726 | 1.284 | 0.649 | 0.086 |
| PE-CHC                                          | Chih./Moris                | 28°13'18" | -108°43'51" | 1876 | 4.704  | 35 | 66.059 | 61.462 | 1.290 | 0.654 | 0.092 |
| PE-MC3                                          | Chih./Urique               | 27°19'40" | -108°09'42" | 1838 | 4.985  | 35 | 70.134 | 67.583 | 1.313 | 0.761 | 0.131 |
| PE-AM                                           | Chih./Gpe. y Calvo         | 26°13'04" | -106°50'59" | 2390 | 17.259 | 35 | 66.718 | 60.924 | 1.289 | 0.632 | 0.080 |
| Central populations of <i>P. engelmannii</i>    |                            |           |             |      |        |    |        |        |       |       |       |
| PE-MCHI                                         | Chih./Guachochi            | 27°9'58"  | -107°00'07" | 2344 | 16.019 | 35 | 70.351 | 66.874 | 1.314 | 0.715 | 0.123 |
| PE-MM-S2                                        | Dgo./Santiago Papasquiario | 24°58'15" | -105°32'33" | 2347 | 1.919  | 35 | 67.527 | 58.319 | 1.281 | 0.638 | 0.079 |
| PE-CUE                                          | Chih./Guachochi            | 27°13'24" | -107°3'28"  | 2309 | 18.22  | 35 | 72.102 | 67.751 | 1.315 | 0.753 | 0.146 |
| PE-LCH                                          | Chih./Madera               | 29°12'51" | -108°9'17"  | 2180 | 2.493  | 35 | 66.749 | 59.281 | 1.285 | 0.630 | 0.078 |
| PE-ON                                           | Chih./Madera               | 29°15'27" | -108°08'13" | 2176 | 3.696  | 35 | 67.209 | 64.091 | 1.299 | 0.684 | 0.098 |
| PE-MC-U                                         | Chih./Urique               | 27°26'30" | -108°3'56"  | 2090 | 6.382  | 35 | 70.730 | 69.788 | 1.322 | 0.704 | 0.107 |
| Peripheral populations of <i>P. herrerae</i>    |                            |           |             |      |        |    |        |        |       |       |       |
| PH-PSU                                          | Dgo. /San Dimas            | 24°26'13" | -106°07'54" | 2663 | 5.38   | 35 | 72.639 | 70.716 | 1.333 | 0.780 | 0.210 |
| PH-RM                                           | Dgo. /San Dimas            | 24°26'01" | -106°03'08" | 2434 | 7.89   | 35 | 73.586 | 69.600 | 1.329 | 0.742 | 0.223 |
| PH-MC2                                          | Chih./Urique               | 27°19'29" | -108°09'37" | 1841 | 11.49  | 35 | 68.117 | 57.903 | 1.279 | 0.621 | 0.131 |
| PH-MC1                                          | Chih./Urique               | 27°18'37" | -108°09'33" | 1858 | 13.17  | 35 | 72.761 | 59.839 | 1.285 | 0.663 | 0.142 |
| Central populations of <i>P. herrerae</i>       |                            |           |             |      |        |    |        |        |       |       |       |
| PH-GUH                                          | Dgo./San Dimas             | 24°28'06" | -106°06'12" | 2358 | 3.98   | 35 | 69.517 | 61.855 | 1.302 | 0.649 | 0.135 |

|                                                       |                               |           |             |      |       |    |        |        |       |       |       |
|-------------------------------------------------------|-------------------------------|-----------|-------------|------|-------|----|--------|--------|-------|-------|-------|
| PH-PI                                                 | Chih./Urique                  | 27°18'37" | -108°09'33" | 2399 | 12.61 | 35 | 77.212 | 72.128 | 1.338 | 0.778 | 0.277 |
| PH-MR                                                 | Chih./Ocampo                  | 28°10'22" | -108°15'01" | 2251 | 5.63  | 35 | 72.155 | 67.439 | 1.319 | 0.715 | 0.199 |
| PH-MC                                                 | Chih./Guazapares              | 27°27'02" | -108°04'44" | 2089 | 7.85  | 35 | 68.661 | 61.560 | 1.295 | 0.621 | 0.140 |
| <b>Peripheral populations of <i>P. leiophylla</i></b> |                               |           |             |      |       |    |        |        |       |       |       |
| PLE-CMP                                               | Chih./Urique                  | 27°16'12" | -108°00'53" | 2035 | 1.91  | 35 | 74.799 | 70.259 | 1.330 | 0.778 | 0.234 |
| PLE-AG                                                | Dgo./Santiago<br>Papasquiario | 29°17'22" | -108°06'00" | 2511 | 16.14 | 35 | 75.542 | 71.708 | 1.337 | 0.797 | 0.267 |
| <b>Central populations of <i>P. leiophylla</i></b>    |                               |           |             |      |       |    |        |        |       |       |       |
| PLE-EV                                                | Chih./Madera                  | 29°17'22" | -108°06'00" | 2201 | 9.80  | 35 | 70.973 | 65.402 | 1.306 | 0.731 | 0.243 |
| PLE-FR                                                | Chih./Guachochi               | 26°45'48" | -107°07'17" | 2502 | 6.27  | 35 | 76.210 | 74.897 | 1.354 | 0.778 | 0.244 |

Note: Sample size (N), elevation (Elev.) PopGD = average genetic distance within populations; GD = average genetic distance between populations; DGEO = distance to the nearest edge (km); diversity and divergence indexes:  $v_2$  = measured genetic diversity through the effective number of variants; % *Poly* = percentage of polymorphic fragments; DW = frequency down-weighted marker value.

### Supplementary Figures and Captions.

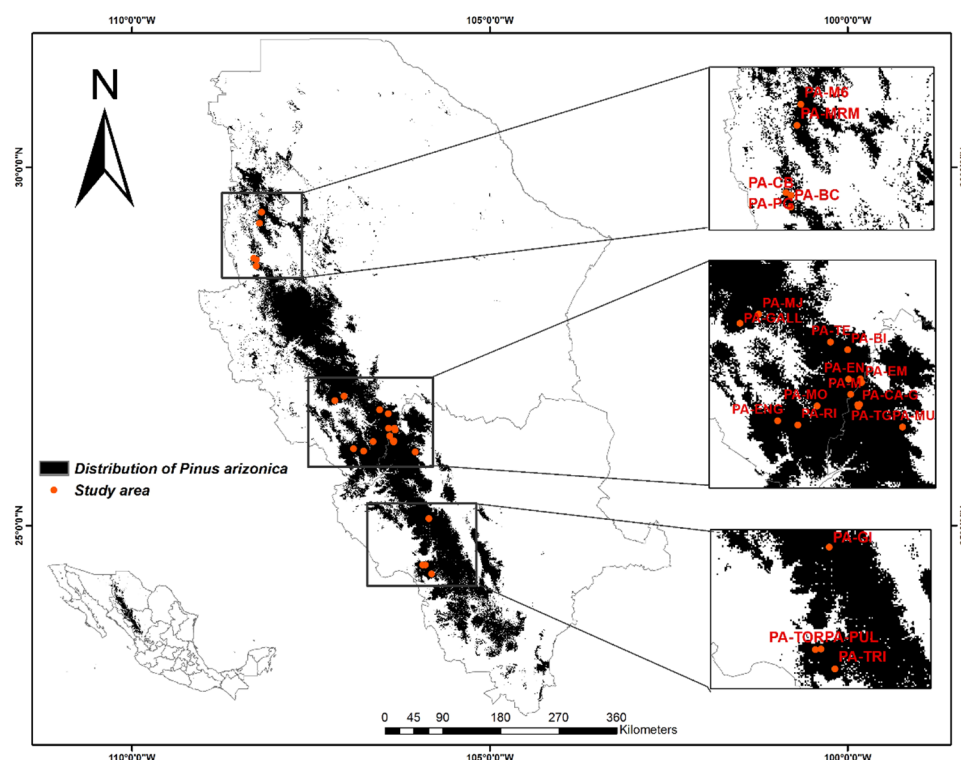

**Figure S1.** Map showing the location of the 25 populations of *P. arizonica*.

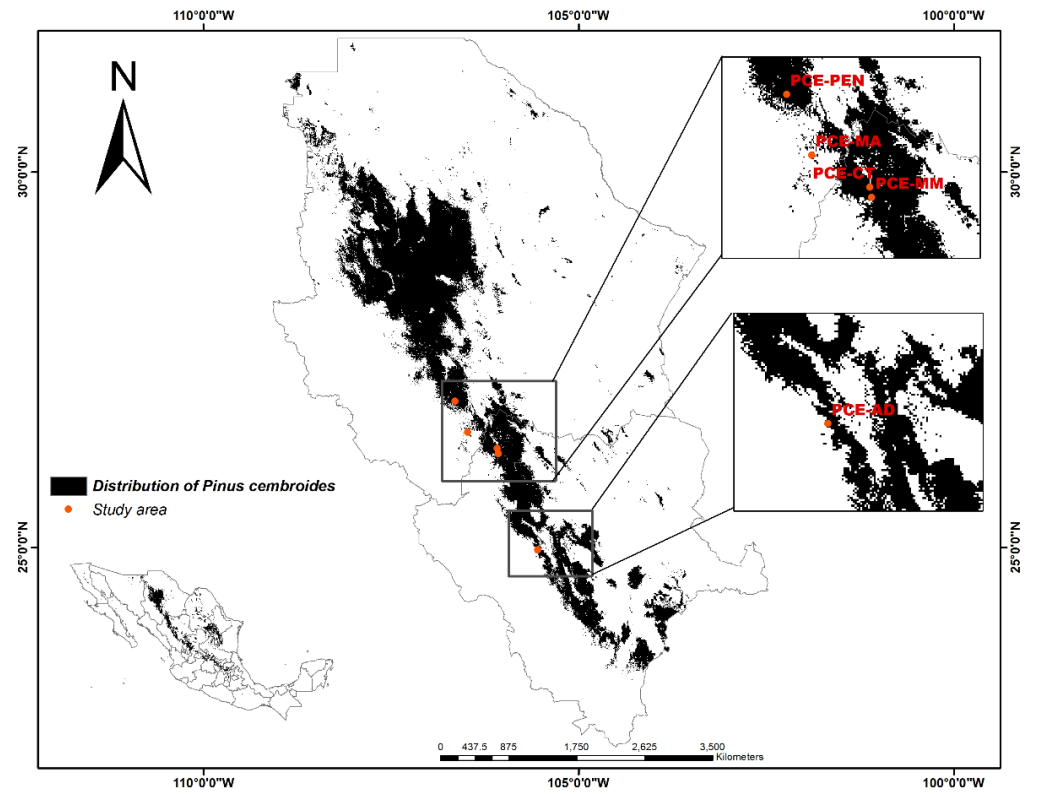

Figure S2. Map showing the location of the five populations of *P. cembroides*.

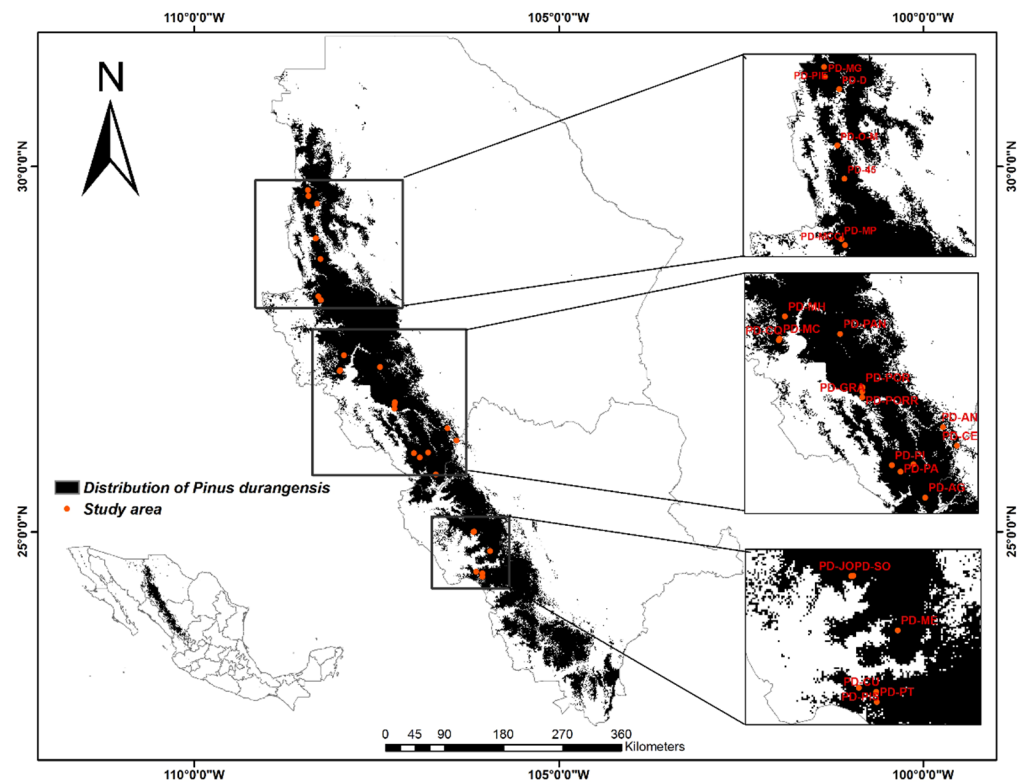

Figure S3. Map showing the location of the 26 populations of *P. durangensis*.

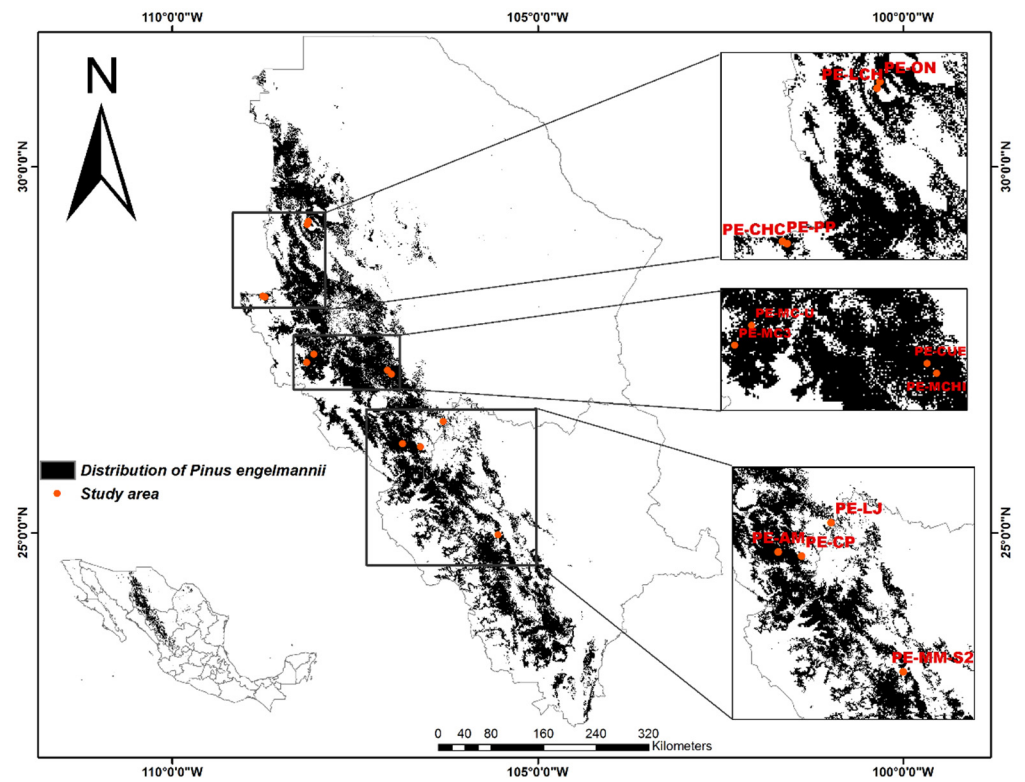

Figure S4. Map showing the location of the 12 populations of *P. engelmannii*.

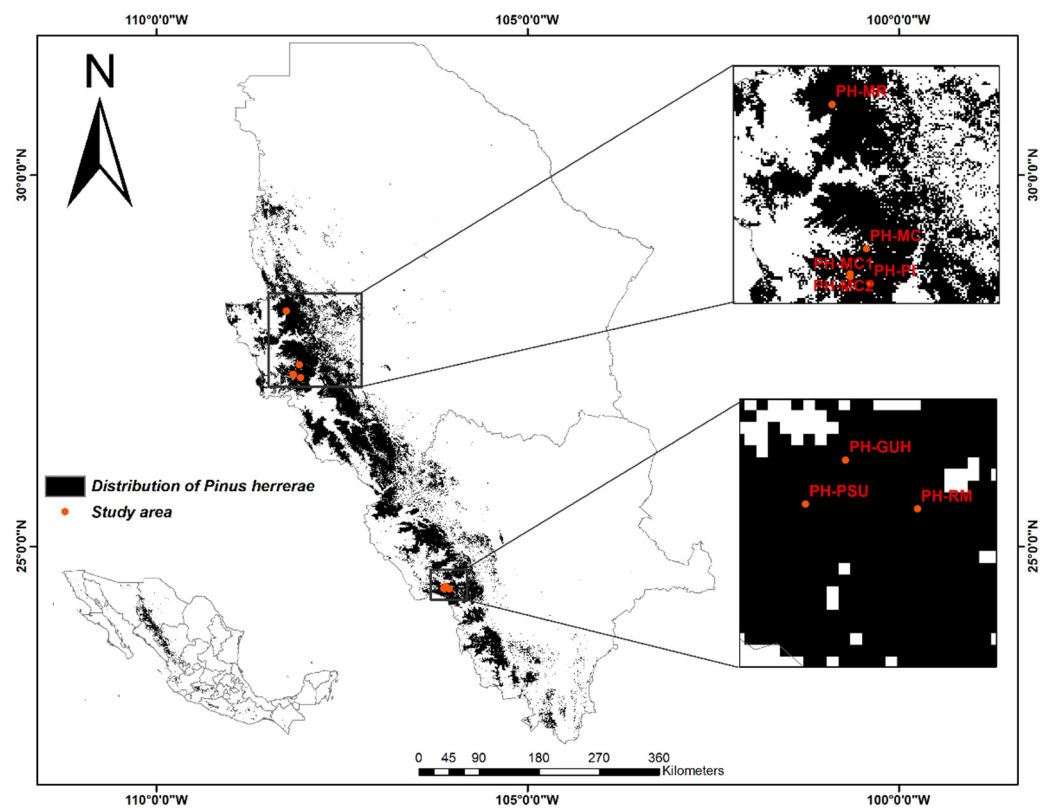

Figure S5. Map showing the location of the eight populations of *P. herrerae*.



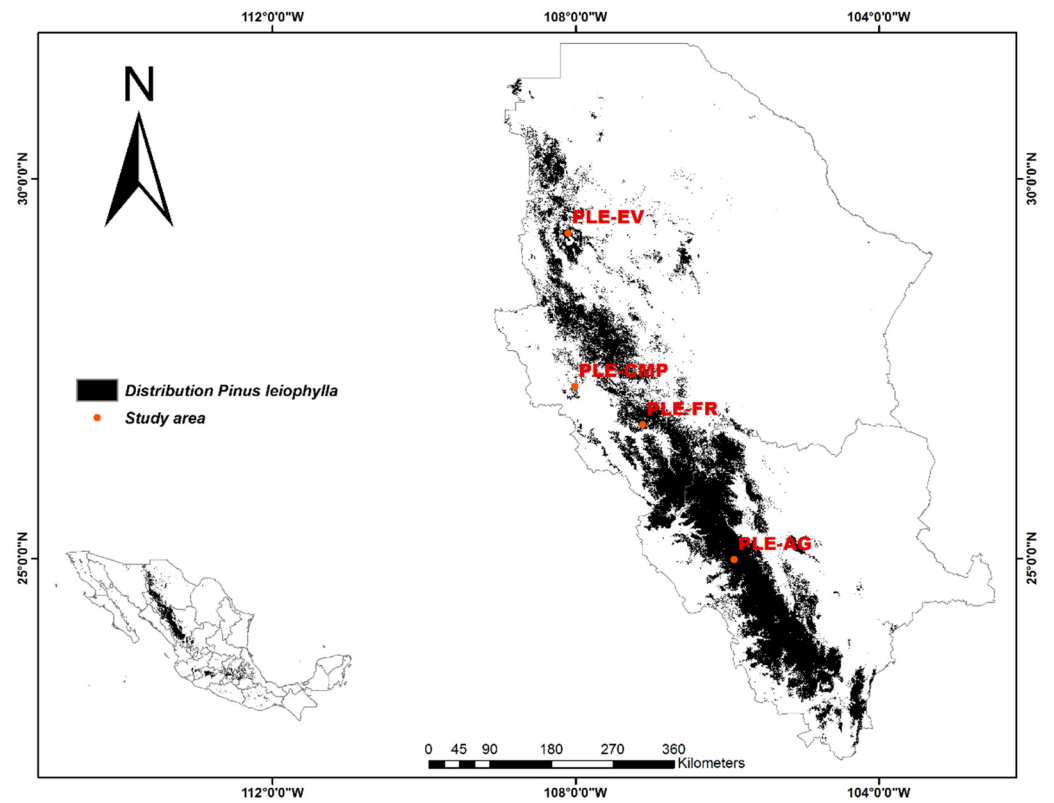

**Figure S6.** Map showing the location of the four populations of *P. leiophylla*.
